# Supplementary material
Source: Research Square preprint supplement (doi:10.21203/rs.3.rs-9696393/v1)

**Title:** Impact of Socioeconomic Status on Early Gastric Cancer Outcomes and Treatment Disparity: A SEER analysis

**Journal:** Journal of Gastrointestinal Cancer

**Authors:** Rinrada Worapongpaiboon MD 1, Sonmoon Mohapatra, MD 2, Kasenee Tiankanon, MD1,3, Saowanee Ngamruengphong, MD 1

**Affiliations:**
1Division of Gastroenterology and Hepatology, Johns Hopkins Medicine, Baltimore, Maryland, USA

2Department of Gastroenterology and Hepatology, Sai Institute of Gastroenterology and Liver Sciences, Bhubaneswar, Odisha, India

3Division of Gastroenterology, Department of Medicine, King Chulalongkorn Memorial Hospital and Chulalongkorn University, Bangkok, Thailand

**Corresponding author:**

Saowanee Ngamruengphong, MD

Gastroenterology and Hepatology, Johns Hopkins University, Baltimore, United States

4940 Eastern Avenue, A Building, 5th Floor. A-501 Baltimore, MD 21224

Email: [sngamru1@jhmi.edu](mailto:sngamru1@jhmi.edu)

Phone: 410-550-0796

**Supplementary Table 1** Demographics, Socioeconomics, Tumor Characteristics, by Treatment Modality of the T1aN0M0 gastric adenocarcinoma patients

|  | Overall | Endoscopy | Surgery | No Treatment | P Value |
| --- | --- | --- | --- | --- | --- |
| Overall (n) | 3792 | 495 | 3034 | 263 |  |
| Age at diagnosis (years), mean (SD) | 70.5 (11.0) | 72.1 (10.6) | 69.7 (11.0) | 75.7 (10.1) | **<0.001** |
| Male sex, n (%) | 2437 (64.3%) | 330 (66.7%) | 1938 (63.9%) | 169 (64.3%) | **0.034** |
| Races, n (%) |  |  |  |  | **<.001** |
| White | 2482 (65.5%) | 384 (77.6%) | 1906 (62.8%) | 192 (73.0%) |  |
| Black | 405 (10.7%) | 37 (7.5%) | 328 (10.8%) | 40 (15.2%) |  |
| Asian/Pacific Islander | 891 (23.5%) | 74 (14.9%) | 786 (25.9%) | 31 (11.8%) |  |
| American Indian/ Alaskan Native | 14 (0.4%) | 0 (0.0%) | 14 (0.5%) | 0 (0.0%) |  |
| Year of Diagnosis, n (%) |  |  |  |  | **<.001** |
| 2004-2007 | 987 (26.0%) | 51 (10.3%) | 876 (28.9%) | 60 (22.8%) |  |
| 2008-2011 | 1132 (29.9%) | 82 (16.6%) | 966 (31.8%) | 84 (31.9%) |  |
| 2012-2015 | 1278 (33.7%) | 211 (42.6%) | 955 (31.5%) | 112 (42.6%) |  |
| 2016-2021 | 395 (10.4%) | 151 (30.5%) | 237 (7.8%) | 7 (2.7%) |  |
| US region, n (%) |  |  |  |  | **0.007** |
| East | 1476 (38.9%) | 211 (42.6%) | 1140 (37.6%) | 125 (47.5%) |  |
| West | 2109 (55.6%) | 252 (50.9%) | 1735 (57.2%) | 122 (46.4%) |  |
| North | 82 (2.2%) | 12 (2.4%) | 65 (2.1%) | 5 (1.9%) |  |
| South | 125 (3.3%) | 20 (4.0%) | 94 (3.1%) | 11 (4.2%) |  |
| Median household income (USD), mean (SD) | 88855 (22964) | 89484 (23192) | 89128 (22755) | 84510 (24528) | **0.011** |
| At least bachelor’s degree (%), mean (SD) | 27.3 (9.4) | 29.4 (11.0) | 27.1 (9.0) | 25.8 (9.1) | **<.001** |
| <150% poverty line (%), mean (SD) | 21.4 (8.1) | 20.0 (8.0) | 21.6 (8.0) | 22.2 (8.6) | **<.001** |
| Current unemployment (%), mean (SD) | 6.4 (2.0) | 6.0 (1.9) | 6.5 (2.0) | 6.4 (2.2) | **<.001** |
| Tumor size (mm), mean (SD) | 21.1 (16.7) | 12.7 (11.7) | 21.6 (16.5) | 30.7 (19.5) | **<0.001** |
| Tumor grade, n (%) |  |  |  |  | **<.001** |
| Well-differentiated; grade I | 671 (17.7%) | 90 (18.2%) | 558 (18.4%) | 23 (8.7%) |  |
| Moderately differentiated; grade II | 1672 (44.1%) | 252 (50.9%) | 1308 (43.1%) | 112 (42.6%) |  |
| Poorly differentiated; grade III | 1290 (34.0%) | 128 (25.9%) | 1041 (34.3%) | 121 (46.0%) |  |
| Undifferentiated; anaplastic; grade IV | 159 (4.2%) | 25 (5.1%) | 127 (4.2%) | 7 (2.7%) |  |
| Received Radiation, n (%) | 199 (5.2%) | 40 (8.1%) | 86 (2.8%) | 73 (27.8%) | **0.007** |
| Received Chemotherapy, n (%) | 300 (7.9%) | 28 (5.7%) | 185 (6.1%) | 87 (33.1%) | **<.001** |

*NOTE. Data are presented as means (SD) or n (%). T, tertile. No treatment= No surgical or endoscopic treatment.*

**Supplementary Table 2** Demographics, Socioeconomics, Tumor Characteristics, and Treatment by Region of the T1aN0M0 gastric adenocarcinoma patients

| Characteristic | Overall | East | West | North | South | P value |
| --- | --- | --- | --- | --- | --- | --- |
| Overall (n) | 3792 | 1476 | 2109 | 82 | 125 |  |
| Age at diagnosis, y (mean, SD) | 70.5 (11.0) | 69.9 (11.1) | 71.0 (10.8) | 68.3 (11.1) | 69.3 (13.2) | **0.003** |
| Male sex, n (%) | 1355 (35.7%) | 539 (36.5%) | 749 (35.5%) | 20 (24.4%) | 47 (37.6%) | 0.155 |
| Race, n (%) |  |  |  |  |  | **<.001** |
| White | 2482 (65.5%) | 1087 (73.6%) | 1201 (56.9%) | 78 (95.1%) | 116 (92.8%) |  |
| Black | 405 (10.7%) | 294 (19.9%) | 107 (5.1%) | 2 (2.4%) | 2 (1.6%) |  |
| Asian/Pacific Islander | 891 (23.5%) | 95 (6.4%) | 791 (37.5%) | 2 (2.4%) | 3 (2.4%) |  |
| American Indian/ Alaskan Native | 14 (0.4%) | 0 (0.0%) | 10 (0.5%) | 0 (0.0%) | 4 (3.2%) |  |
| Median household income, (USD), mean (SD) | 88854.5 (22964) | 81152 (22739) | 95969 (21018) | 69815 (7850) | 72255 (18352) | **<.001** |
| At least bachelor’s degree (%), mean (SD) | 27.3 (9.4) | 26.7 (10.6) | 28.0 (8.4) | 21.7 (7.9) | 26.1 (7.8) | **<.001** |
| <150% poverty line (%), mean (SD) | 21.4 (8.1) | 19.4 (9.1) | 22.8 (6.9) | 17.5 (3.4) | 23.8 (9.7) | **<.001** |
| County unemployment (%), mean (SD) | 6.4 (2.0) | 5.9 (2.0) | 6.9 (2.0) | 4.3 (1.0) | 6.1 (2.5) | **<.001** |
| Tumor size, mm, mean (SD) | 21.1 (16.7) | 21.7 (17.1) | 20.8 (16.5) | 19.4 (13.2) | 20.3 (15.3) | 0.264 |
| Tumor grade, n (%) |  |  |  |  |  | **0.008** |
| Well-differentiated | 671 (17.7%) | 272 (18.4%) | 364 (17.3%) | 7 (8.5%) | 28 (22.4%) |  |
| Moderately differentiated | 1672 (44.1%) | 688 (46.6%) | 892 (42.3%) | 42 (51.2%) | 50 (40.0%) |  |
| Poorly differentiated | 1290 (34.0%) | 466 (31.6%) | 757 (35.9%) | 29 (35.4%) | 38 (30.4%) |  |
| Undifferentiated / anaplastic | 159 (4.2%) | 50 (3.4%) | 96 (4.6%) | 4 (4.9%) | 9 (7.2%) |  |
| Procedure type, n (%) |  |  |  |  |  | **0.002** |
| Endoscopy, n (%) | 495 (13.1%) | 211 (14.3%) | 252 (11.9%) | 12 (14.6%) | 20 (16.0%) | 0.144 |
| Surgery, n (%) | 3034 (80.0%) | 1140 (77.2%) | 1735 (82.3%) | 65 (79.3%) | 94 (75.2%) | **0.0013** |
| No treatment, n (%) | 263 (6.9%) | 125 (8.5%) | 122 (5.8%) | 5 (6.1%) | 11 (8.8%) | **0.015** |
| Received RT, n (%) | 199 (5.2%) | 94 (6.4%) | 87 (4.1%) | 10 (12.2%) | 8 (6.4%) | **<.001** |
| Received chemotherapy, n (%) | 300 (7.9%) | 143 (9.7%) | 131 (6.2%) | 13 (15.9%) | 13 (10.4%) | **<.001** |

*NOTE. Data are presented as means (SD) or n (%). No treatment= No surgery and endoscopy.*

**Supplementary Table 3** Overall Survival, Cancer and Non-cancer Specific Mortality by Treatment Modality (Comparison in pair) of the T1aN0M0 gastric adenocarcinoma patients

|  | Overall | Endoscopy, n (%) | Surgery, n (%) | P value |
| --- | --- | --- | --- | --- |
| Overall (n) | 3481 | 488 | 2993 |  |
| 2-year overall survival | 3256 (93.5%) | 464 (95.1%) | 2792 (93.3%) | 0.992 |
| 5- year overall survival | 3047 (87.5%) | 438 (89.8%) | 2609 (87.2%) | 0.217 |
| 2-year cancer-specific mortality | 222 (6.4%) | 23 (4.7%) | 199 (6.6%) | 0.147 |
| 5-year cancer-specific mortality | 424 (12.2%) | 48 (9.8%) | 376 (12.6%) | 0.095 |
| 2-year noncancer mortality | 3 (0.1%) | 1 (0.2%) | 2 (0.1%) | 0.908 |
| 5-year noncancer mortality | 10 (0.3%) | 2 (0.4%) | 8 (0.3%) | 0.952 |

|  | Overall | Endoscopy, n (%) | No treatment, n (%) | P value |
| --- | --- | --- | --- | --- |
| Overall (n) | 722 | 488 | 234 |  |
| 2-year overall survival | 587 (81.3%) | 464 (95.1%) | 123 (52.6%) | **<0.001** |
| 5- year overall survival | 531 (73.5%) | 438 (89.8%) | 93 (39.7%) | **<0.001** |
| 2-year cancer-specific mortality | 133 (18.4%) | 23 (4.7%) | 110 (47%) | **<0.001** |
| 5-year cancer-specific mortality | 186 (25.8%) | 48 (9.8%) | 138 (%) | **<0.001** |
| 2-year noncancer mortality | 2 (0.3%) | 1 (0.2%) | 1 (0.4%) | 1 |
| 5-year noncancer mortality | 5 (0.7%) | 2 (0.4%) | 3 (1.3%) | 0.396 |

|  | Overall | Surgery, n (%) | No treatment, n (%) | P value |
| --- | --- | --- | --- | --- |
| Overall (n) | 3227 | 2993 | 234 |  |
| 2-year overall survival | 2915 (90.3%) | 2792 (93.3%) | 123 (52.6%) | **<0.001** |
| 5- year overall survival | 2702 (83.7%) | 2609 (87.2%) | 93 (39.7%) | **<0.001** |
| 2-year cancer-specific mortality | 309 (9.6%) | 199 (6.6%) | 110 (47%) | **<0.001** |
| 5-year cancer-specific mortality | 514 (16%) | 376 (12.6%) | 138 (%) | **<0.001** |
| 2-year noncancer mortality | 3 (0.1%) | 2 (0.1%) | 1 (0.4%) | 0.539 |
| 5-year noncancer mortality | 11 (0.3%) | 8 (0.3%) | 3 (1.3%) | 0.0515 |

**Supplementary Table 4** Overall Survival, Cancer and Non-cancer Specific Mortality at 2- and 5-year by region of the T1aN0M0 gastric adenocarcinoma patients

|  | Overall, n (%) | East, n (%) | West, n (%) | North, n (%) | South, n (%) | P value |
| --- | --- | --- | --- | --- | --- | --- |
| Overall (n) | 3715 | 1442 | 2071 | 81 | 121 |  |
| 2-year overall survival | 3379 (91%) | 1073 (74.4%) | 1665 (80.4%) | 60 (74.1%) | 90 (74.4%) | **<0.001** |
| 5-year overall survival | 3140 (84.5%) | 783 (54.3%) | 1265 (61.1%) | 47 (58.0%) | 58 (47.9%) | **<0.001** |
| 2-year cancer-specific mortality | 332 (8.9%) | 153 (10.6%) | 161 (7.8%) | 5 (6.2%) | 13 (10.7%) | **0.022** |
| 5-year cancer-specific mortality | 562 (15.1%) | 233 (16.2%) | 301 (14.5%) | 9 (11.1%) | 19 (15.7%) | 0.422 |
| 2-year noncancer mortality | 4 (0.1%) | 0 (0.0%) | 3 (0.1%) | 0 (0.0%) | 1 (0.8%) | 0.052 |
| 5-year noncancer mortality | 13 (0.3%) | 3 (0.2%) | 9 (0.4%) | 0 (0.0%) | 1 (0.8%) | 0.507 |

*NOTE. Data are presented as %*

**Supplementary Figure 1** Surveillance, Epidemiology, and End Results geographic regions. Registry data were divided geographically into 4 geographic regions: West (blue), South (orange), East (green), North (purple) of the T1aN0M0 gastric adenocarcinoma patients

**
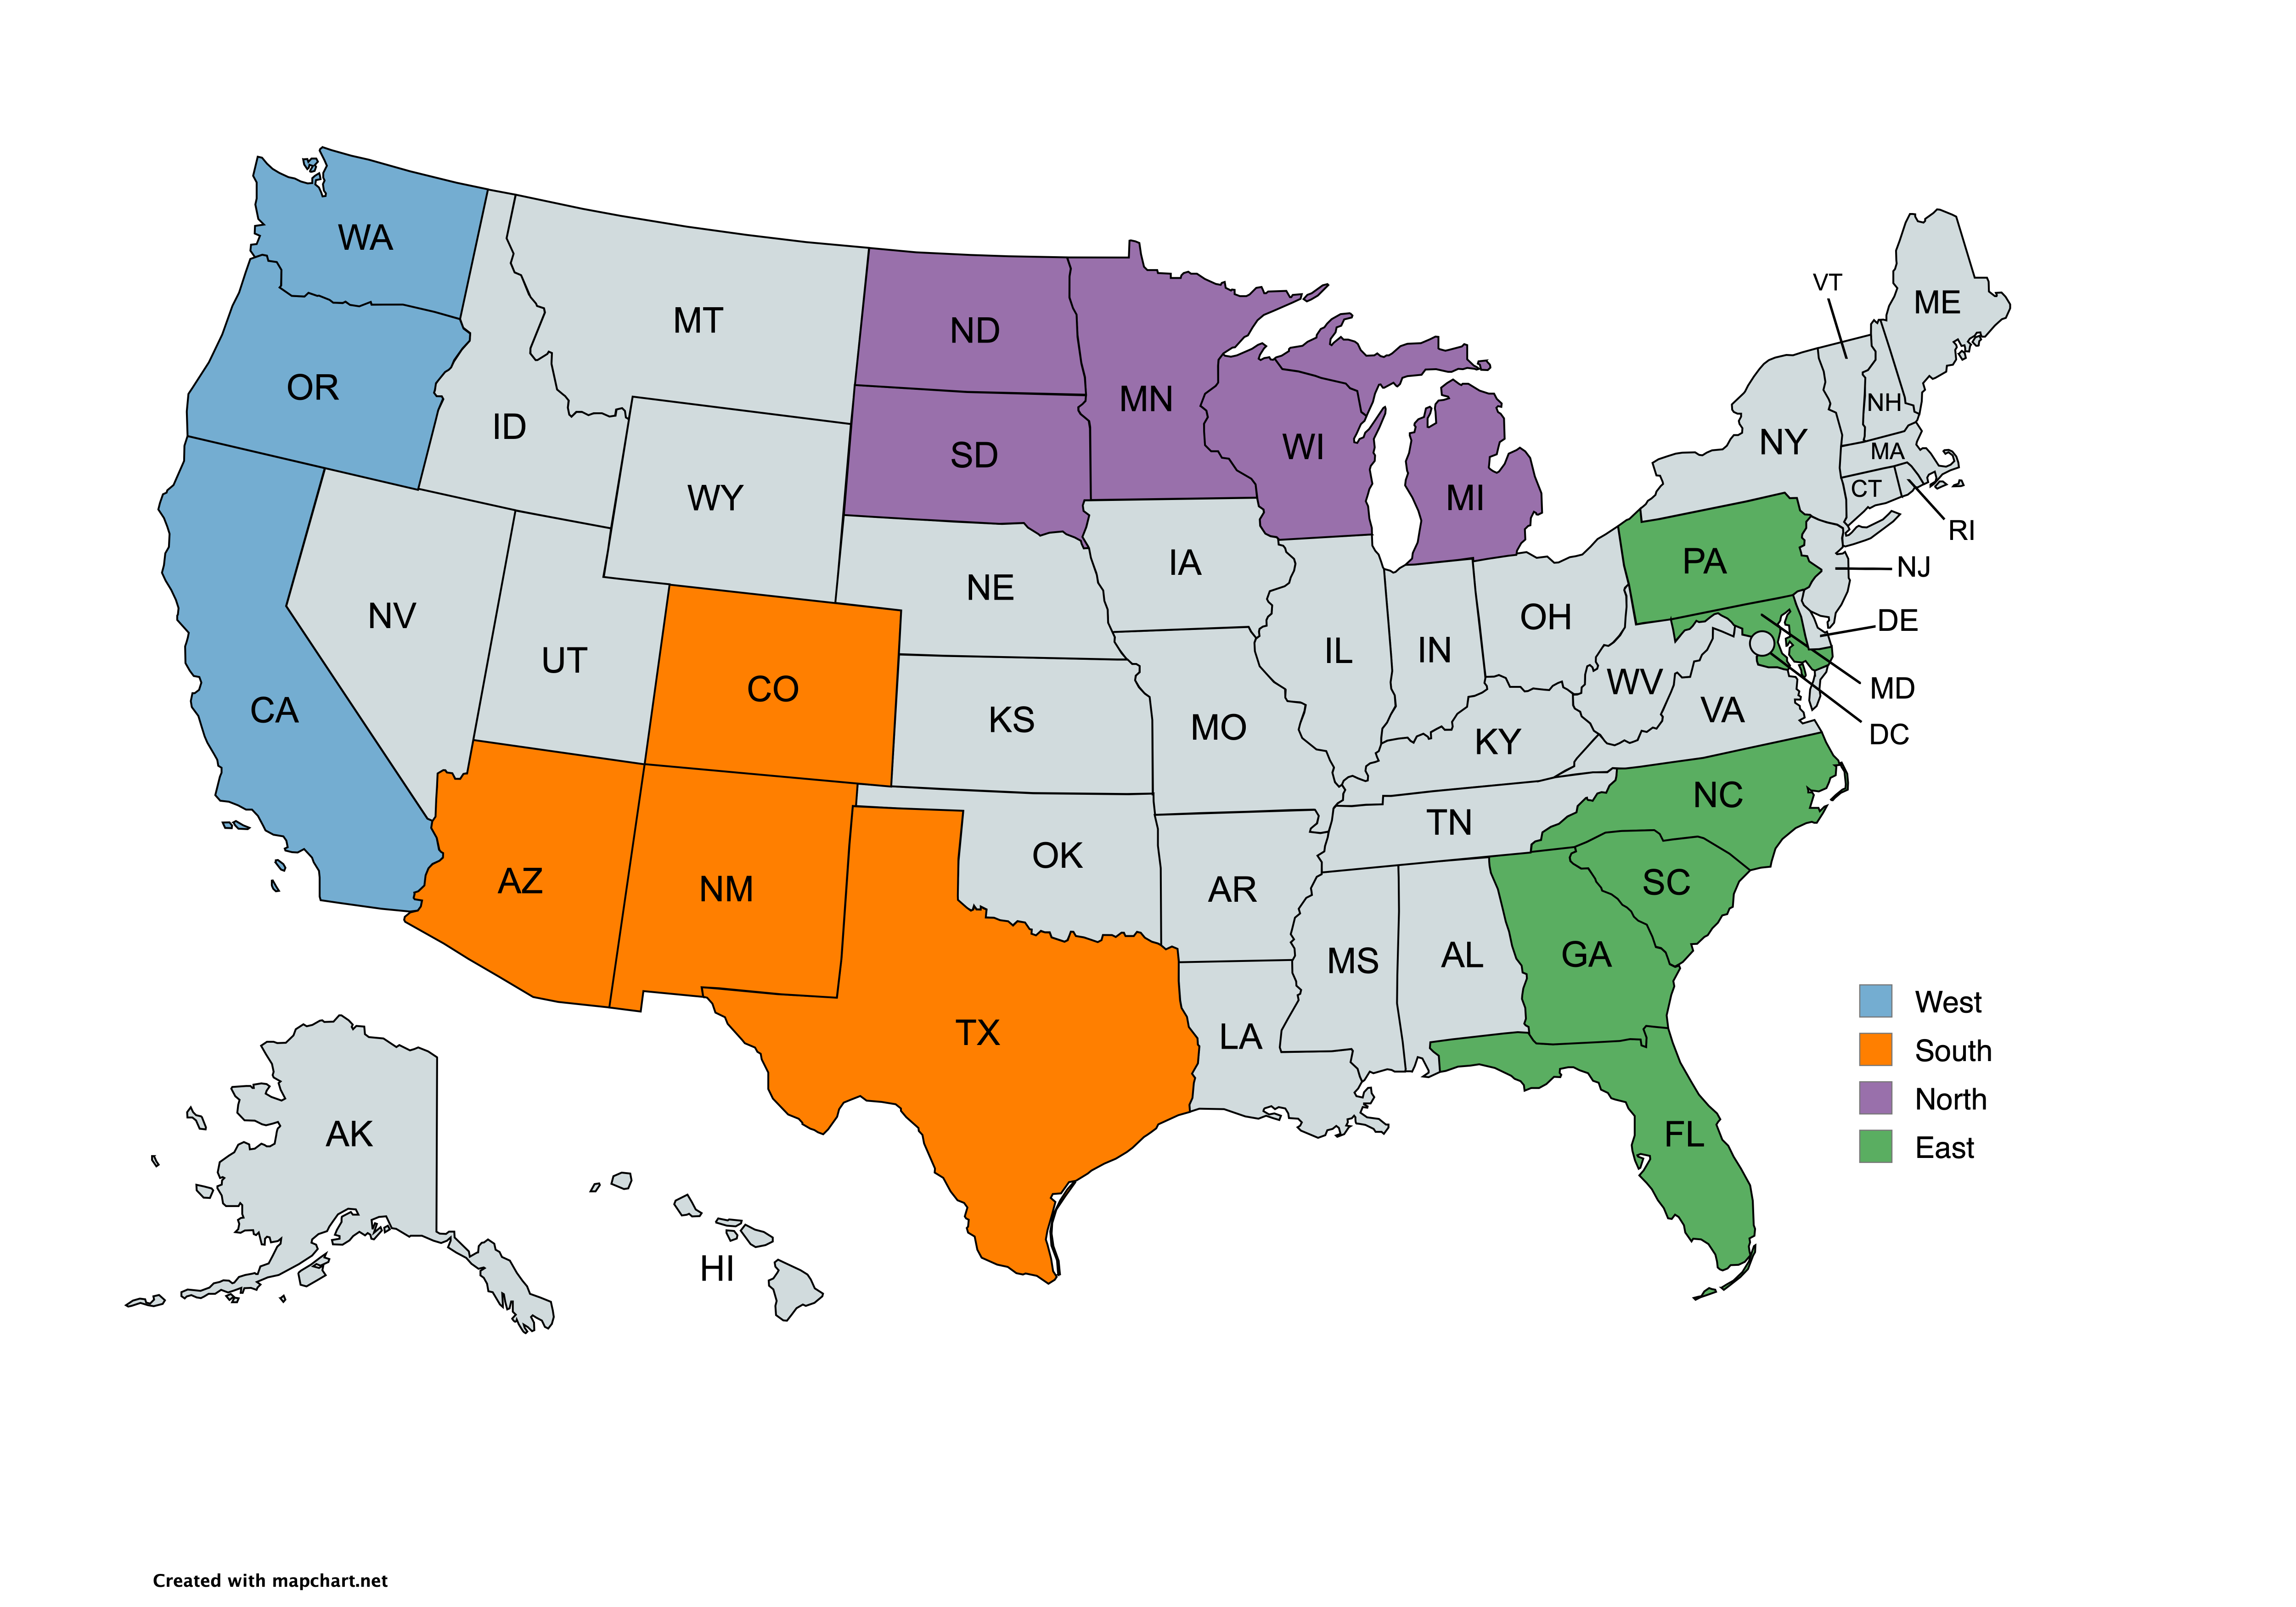
**

**Supplementary Figure 2** Forest plot for hazard ratio and 95% CI for selected variables from multivariable regression of the T1aN0M0 gastric adenocarcinoma patients. Reference variables used to calculate the hazard ratios are available in Table 4.


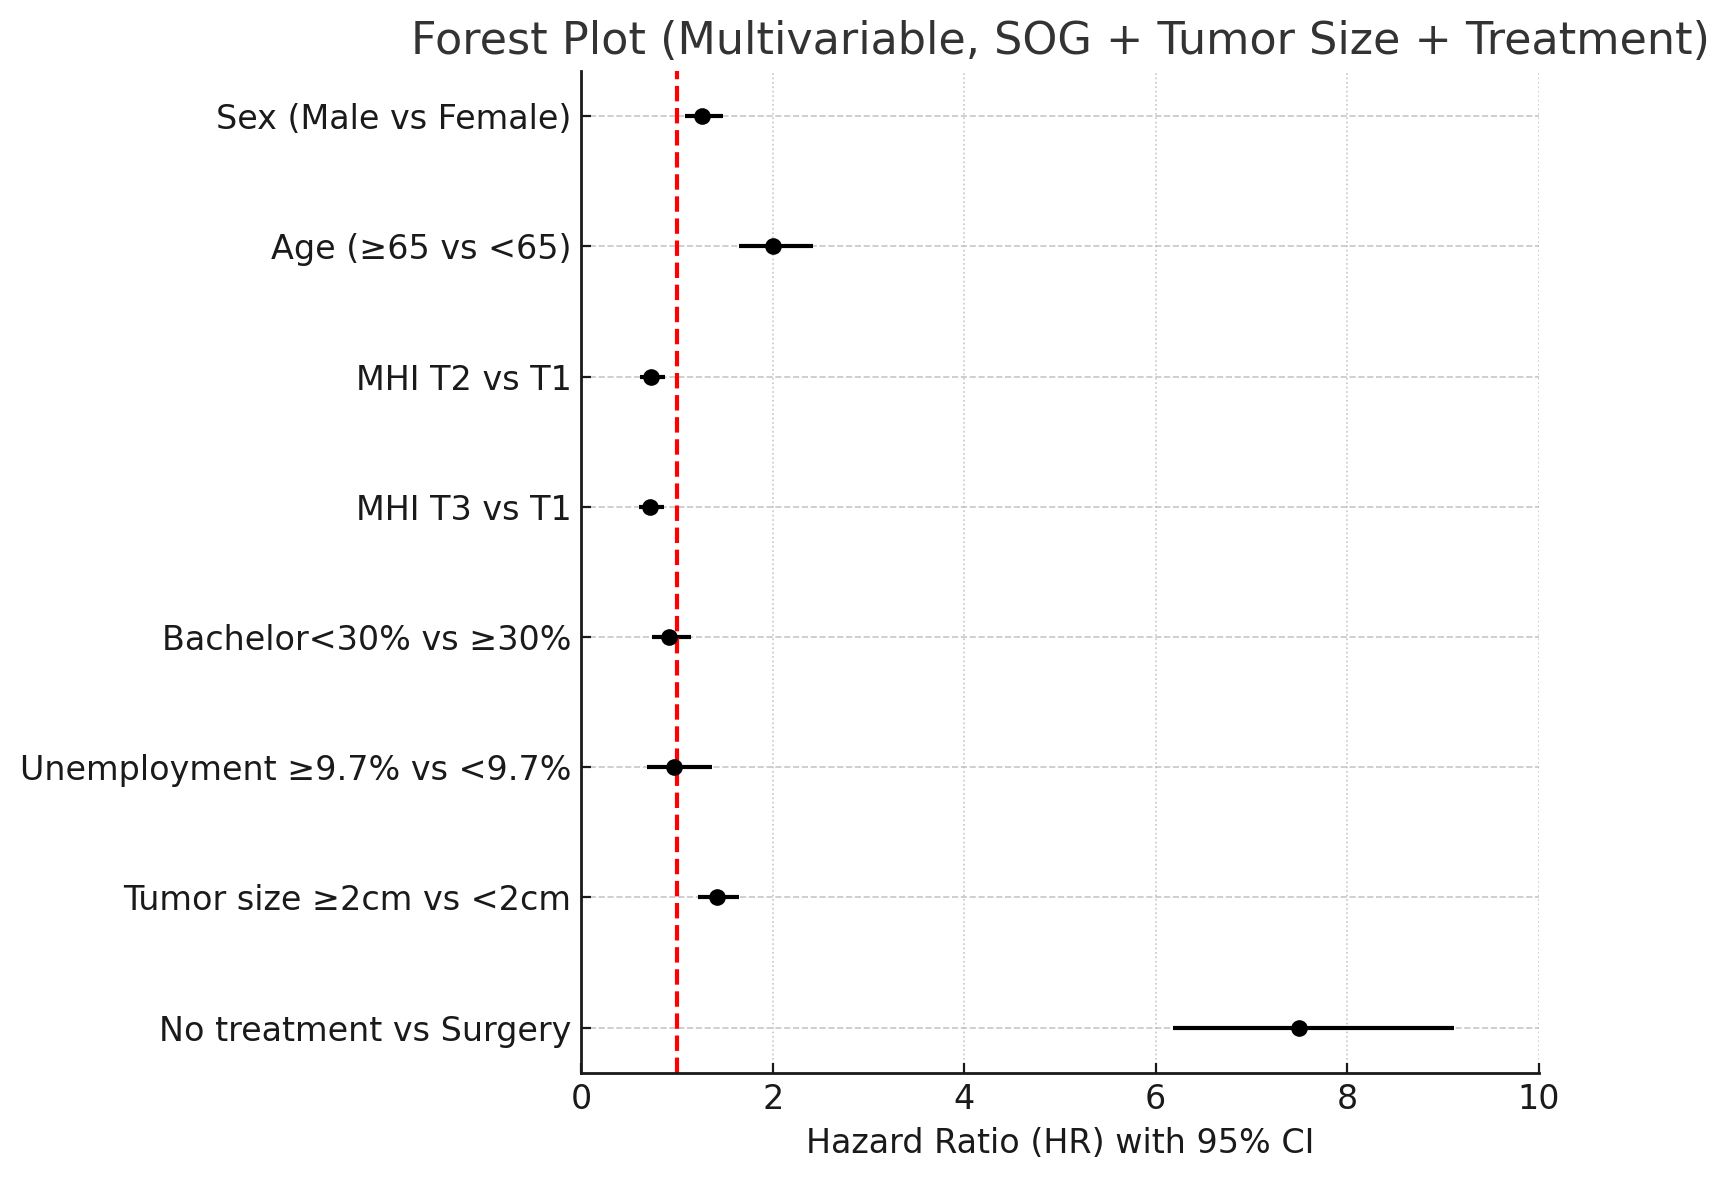

Supplement: Supplementary file 1 [file 0cb7a59597a636152d4e5ae5.docx]
